# Supplementary material for: An advanced structural characterization of templated meso-macroporous carbon monoliths by small- and wide-angle scattering techniques
Source: publisher site journal article supplement (doi:10.3762/bjnano.11.23), 2020-02-10
Supplement: Additional file 1 [file 2190-4286-11-23-S1.pdf]

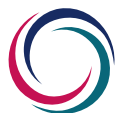

## Supporting Information

for

### **An advanced structural characterization of templated meso-macroporous carbon monoliths by small- and wide-angle scattering techniques**

Felix M. Badaczewski, Marc O. Loeh, Torben Pfaff, Dirk Wallacher, Daniel Clemens and Bernd M. Smarsly

*Beilstein J. Nanotechnol.* **2020**, *11*, 310–322. [doi:10.3762/bjnano.11.23](https://doi.org/10.3762/bjnano.11.23)

### **SEM images of the silica template and the carbon monolith (800 °C)**

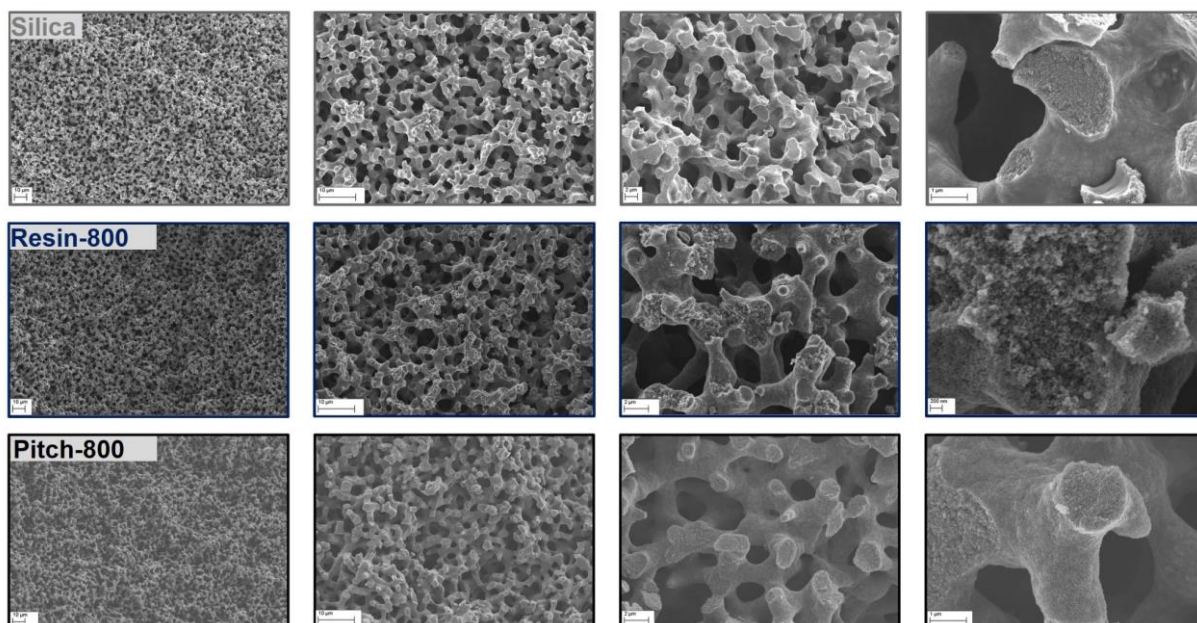

**Figure S1:** SEM pictures of the silica template (grey), the resin-based (blue) and the pitch-based (black) monolith carbonized at 800 °C.
